# Supplementary material
Source: HighWire-hosted journal article supplement (https://drc.bmj.com/content/4/1/e000276)
Supplement: inline-supplementary-material-1 [file inline-supplementary-material-1.pdf]

# **Supplemental Materials**

**Supplement Figure S1**

**&**

**Supplement Tables S1-S3**

Supplemental Figure S1.

Percent Difference in High Sensitivity C-reactive Protein between Diets

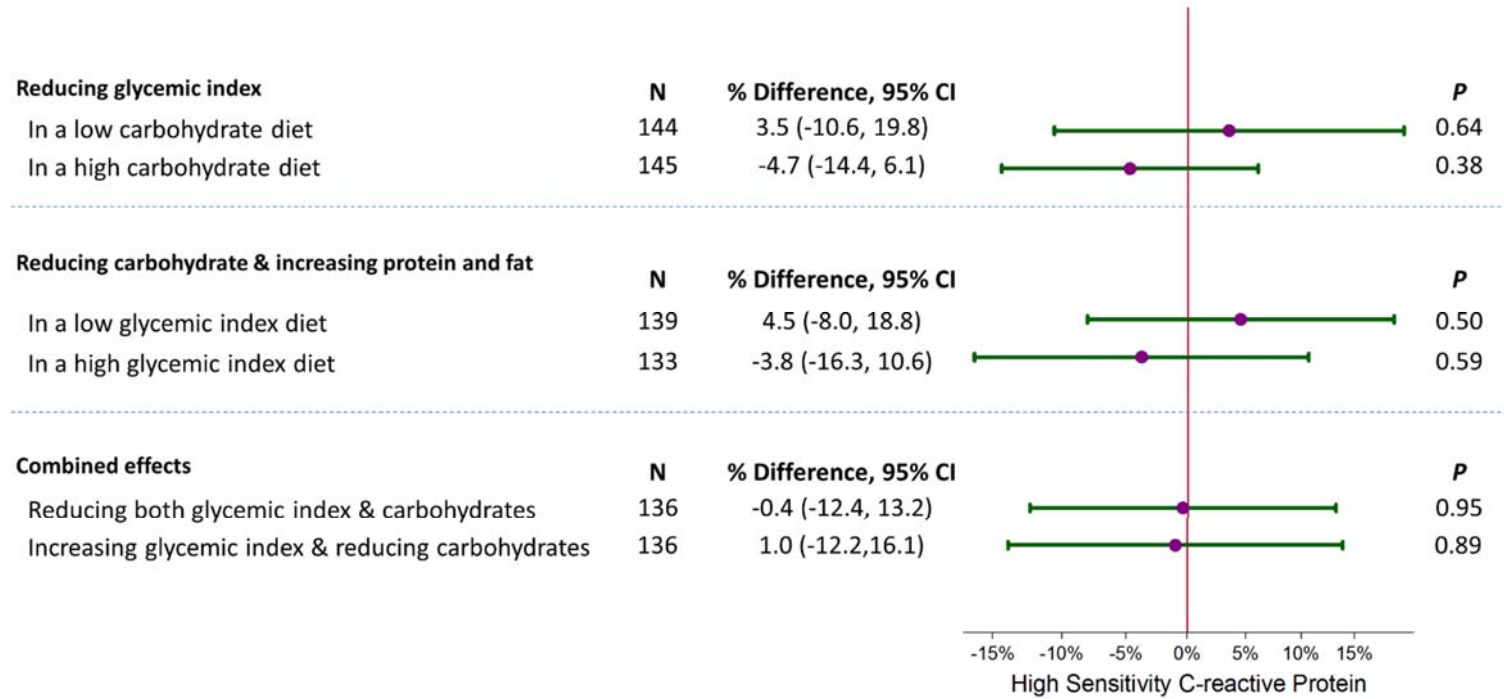

**Caption.** Between diet comparisons and 95% confidence intervals of the percent difference in high sensitivity C-reactive protein measured at the end of each feeding period. The feeding periods are grouped by glycemic index comparisons (low versus high glycemic index), carbohydrate proportion (low versus high proportion), and changes in both glycemic and amount of carbohydrates, i.e. reductions in both or an increase in glycemic index while decreasing amount of carbohydrate.

**Supplement Table S1. Comparison of glycated albumin or fructosamine between diets in strata of race, hypertension status, baseline triglycerides, body mass index, homeostasis model assessment (HOMA) of insulin resistance, baseline fasting glucose, baseline glycated albumin, and baseline fructosamine.\***

|                                    | Baseline<br>No. | Mean (95% Confidence Interval) Difference between Diets |          |                                                       |          |                                                     |          |
|------------------------------------|-----------------|---------------------------------------------------------|----------|-------------------------------------------------------|----------|-----------------------------------------------------|----------|
|                                    |                 | Reducing GI in setting of a<br>high carbohydrate diet   |          | Reducing carbohydrate in<br>setting of a high GI diet |          | Reducing both GI and<br>carbohydrate simultaneously |          |
|                                    |                 | Difference, 95% CI                                      | <i>P</i> | Difference, 95% CI                                    | <i>P</i> | Difference, 95% CI                                  | <i>P</i> |
| Plasma Glycated albumin, %*        |                 |                                                         |          |                                                       |          |                                                     |          |
| Non-Hispanic                       |                 |                                                         |          |                                                       |          |                                                     |          |
| White                              | 65              | -0.05 (-0.33, 0.23)                                     | 0.91     | 0.05 (-0.29, 0.38)                                    | 0.05     | 0.01 (-0.32, 0.34)                                  | 0.22     |
| Black                              | 79              | -0.03 (-0.23, 0.17)                                     |          | -0.36 (-0.60, -0.12)                                  |          | -0.24 (-0.46, -0.02)                                |          |
| Hypertension status                |                 |                                                         |          |                                                       |          |                                                     |          |
| No                                 | 116             | 0.03 (-0.15, 0.22)                                      | 0.24     | -0.27 (-0.49, -0.04)                                  | 0.29     | -0.13 (-0.32, 0.07)                                 | 0.95     |
| Yes                                | 40              | -0.21 (-0.56, 0.15)                                     |          | -0.04 (-0.41, 0.33)                                   |          | -0.11 (-0.55, 0.32)                                 |          |
| Baseline Triglycerides, mg/dl      |                 |                                                         |          |                                                       |          |                                                     |          |
| ≤ 83.8                             | 77              | 0.02 (-0.21, 0.24)                                      | 0.63     | -0.29 (-0.55, -0.04)                                  | 0.39     | -0.20 (-0.46, 0.06)                                 | 0.41     |
| > 83.8                             | 79              | -0.06 (-0.30, 0.17)                                     |          | -0.13 (-0.42, 0.17)                                   |          | -0.05 (-0.31, 0.22)                                 |          |
| Body mass index, kg/m <sup>2</sup> |                 |                                                         |          |                                                       |          |                                                     |          |
| 25-29.9                            | 68              | 0.02 (-0.18, 0.22)                                      | 0.60     | -0.18 (-0.43, 0.07)                                   | 0.78     | -0.07 (-0.33, 0.18)                                 | 0.65     |
| 30+                                | 88              | -0.07 (-0.31, 0.18)                                     |          | -0.23 (-0.51, 0.05)                                   |          | -0.16 (-0.42, 0.10)                                 |          |
| HOMA, units                        |                 |                                                         |          |                                                       |          |                                                     |          |
| ≤1.48                              | 77              | -0.04 (-0.28, 0.19)                                     | 0.88     | -0.20 (-0.48, 0.09)                                   | 0.87     | -0.12 (-0.37, 0.12)                                 | 0.94     |
| >1.48                              | 79              | -0.02 (-0.24, 0.21)                                     |          | -0.22 (-0.49, 0.04)                                   |          | -0.13 (-0.41, 0.14)                                 |          |
| Fasting glucose, mg/dL             |                 |                                                         |          |                                                       |          |                                                     |          |
| <100                               | 100             | 0.02 (-0.19, 0.23)                                      | 0.46     | -0.19 (-0.43, 0.05)                                   | 0.75     | -0.06 (-0.30, 0.17)                                 | 0.38     |
| ≥100                               | 56              | -0.11 (-0.36, 0.14)                                     |          | -0.25 (-0.58, 0.07)                                   |          | -0.23 (-0.53, 0.07)                                 |          |
| Glycated albumin, %                |                 |                                                         |          |                                                       |          |                                                     |          |

|                                    |     |                     |      |                     |      |                      |      |
|------------------------------------|-----|---------------------|------|---------------------|------|----------------------|------|
| ≤14.8                              | 65  | -0.02 (-0.25, 0.21) | 0.50 | -0.02 (-0.28, 0.23) | 0.20 | -0.02 (-0.30, 0.26)  | 0.38 |
| >14.8                              | 65  | 0.09 (-0.14, 0.32)  |      | -0.28 (-0.58, 0.01) |      | -0.19 (-0.44, 0.07)  |      |
| Fructosamine, μmol/L               |     |                     |      |                     |      |                      |      |
| ≤234.5                             | 65  | -0.05 (-0.31, 0.22) | 0.36 | -0.19 (-0.45, 0.07) | 0.74 | -0.08 (-0.36, 0.20)  | 0.85 |
| >234.5                             | 65  | 0.11 (-0.09, 0.31)  |      | -0.13 (-0.42, 0.17) |      | -0.12 (-0.38, 0.14)  |      |
| Plasma Fructosamine, μmol/L*       |     |                     |      |                     |      |                      |      |
| Non-Hispanic                       |     |                     |      |                     |      |                      |      |
| White                              | 65  | 5.71 (1.71, 9.71)   | 0.08 | 0.49 (-4.80, 5.78)  | 0.25 | 2.14 (-2.64, 6.92)   | 0.03 |
| Black                              | 79  | 0.07 (-4.88, 5.01)  |      | -3.61 (-8.18, 0.97) |      | -4.97 (-9.28, -0.66) |      |
| Hypertension status                |     |                     |      |                     |      |                      |      |
| No                                 | 116 | 1.47 (-2.33, 5.28)  | 0.30 | -3.01 (-7.04, 1.01) | 0.04 | -2.84 (-6.47, 0.79)  | 0.13 |
| Yes                                | 40  | 5.12 (-0.75, 10.99) |      | 4.34 (-1.62, 10.31) |      | 2.55 (-3.50, 8.60)   |      |
| Baseline Triglycerides, mg/dl      |     |                     |      |                     |      |                      |      |
| ≤ 83.8                             | 77  | 2.70 (-2.75, 8.16)  | 0.89 | -1.63 (-6.73, 3.47) | 0.74 | -0.26 (-5.08, 4.56)  | 0.46 |
| > 83.8                             | 79  | 2.28 (-0.94, 5.50)  |      | -0.43 (-4.89, 4.03) |      | -2.57 (-6.42, 1.27)  |      |
| Body mass index, kg/m <sup>2</sup> |     |                     |      |                     |      |                      |      |
| 25-29.9                            | 68  | 4.44 (-0.22, 9.10)  | 0.29 | 0.23 (-4.31, 4.77)  | 0.49 | -1.52 (-5.79, 2.75)  | 0.98 |
| 30+                                | 88  | 0.96 (-3.45, 5.37)  |      | -2.15 (-7.09, 2.80) |      | -1.41 (-5.91, 3.09)  |      |
| HOMA, units                        |     |                     |      |                     |      |                      |      |
| ≤1.48                              | 77  | 1.66 (-3.40, 6.72)  | 0.66 | -3.36 (-8.35, 1.64) | 0.21 | -2.41 (-7.35, 2.52)  | 0.56 |
| >1.48                              | 79  | 3.12 (-0.90, 7.14)  |      | 0.98 (-3.61, 5.57)  |      | -0.54 (-4.50, 3.43)  |      |
| Fasting glucose, mg/dL             |     |                     |      |                     |      |                      |      |
| <100                               | 100 | 4.12 (-0.25, 8.49)  | 0.13 | -1.22 (-5.48, 3.05) | 0.94 | -0.55 (-4.75, 3.66)  | 0.45 |
| ≥100                               | 56  | -0.62 (-4.84, 3.60) |      | -0.88 (-6.62, 4.85) |      | -2.92 (-7.45, 1.61)  |      |
| Glycated albumin, %                |     |                     |      |                     |      |                      |      |
| ≤14.8                              | 65  | 4.45 (-0.16, 9.07)  | 0.21 | 1.88 (-3.15, 6.91)  | 0.16 | -0.92 (-5.71, 3.87)  | 0.75 |
| >14.8                              | 65  | -0.04 (-5.47, 5.38) |      | -3.55 (-9.18, 2.08) |      | -2.10 (-7.29, 3.09)  |      |

|                                 |    |                          |      |                      |      |                     |      |
|---------------------------------|----|--------------------------|------|----------------------|------|---------------------|------|
| Fructosamine, $\mu\text{mol/L}$ |    |                          |      |                      |      |                     |      |
| $\leq 234.5$                    | 65 | <b>5.35 (1.58, 9.11)</b> | 0.09 | 3.54 (-0.60, 7.68)   | 0.03 | 1.24 (-2.96, 5.43)  | 0.13 |
| $> 234.5$                       | 65 | -0.56 (-6.29, 5.17)      |      | -4.67 (-10.70, 1.36) |      | -4.04 (-9.43, 1.36) |      |

---

Note: HOMA represents homeostasis model assessment.

\*This population was restricted to non-hemolyzed specimens due to the effects of hemolysis on the glycated albumin and fructosamine assays.

While only 130 persons contributed baseline data, 156 contributed at least 2 dietary comparisons.

**Supplement Table S1. Comparison of glycated albumin or fructosamine between diets in strata of race, hypertension status, baseline triglycerides, body mass index, homeostasis model assessment (HOMA) of insulin resistance, baseline fasting glucose, baseline glycated albumin, and baseline fructosamine.\* Continued.**

| Baseline                           | Mean (95% Confidence Interval) Difference between Diets |                                                                         |      |                                                                         |      |                                                                                |      |
|------------------------------------|---------------------------------------------------------|-------------------------------------------------------------------------|------|-------------------------------------------------------------------------|------|--------------------------------------------------------------------------------|------|
|                                    | No.                                                     | Reducing GI in setting of a low carbohydrate diet<br>Difference, 95% CI | P    | Reducing carbohydrate in setting of a low GI diet<br>Difference, 95% CI | P    | Increasing GI while reducing carbohydrate simultaneously<br>Difference, 95% CI | P    |
| Plasma Glycated albumin, %*        |                                                         |                                                                         |      |                                                                         |      |                                                                                |      |
| Non-Hispanic                       |                                                         |                                                                         |      |                                                                         |      |                                                                                |      |
| White                              | 65                                                      | -0.04 (-0.30, 0.22)                                                     | 0.35 | 0.06 (-0.24, 0.36)                                                      | 0.13 | 0.10 (-0.23, 0.42)                                                             | 0.02 |
| Black                              | 79                                                      | 0.12 (-0.08, 0.33)                                                      |      | -0.21 (-0.38, -0.03)                                                    |      | -0.33 (-0.51, -0.15)                                                           |      |
| Hypertension status                |                                                         |                                                                         |      |                                                                         |      |                                                                                |      |
| No                                 | 116                                                     | 0.14 (-0.01, 0.29)                                                      | 0.32 | -0.16 (-0.33, 0.01)                                                     | 0.22 | -0.30 (-0.49, -0.11)                                                           | 0.04 |
| Yes                                | 40                                                      | -0.07 (-0.48, 0.33)                                                     |      | 0.09 (-0.28, 0.46)                                                      |      | 0.17 (-0.23, 0.56)                                                             |      |
| Baseline Triglycerides, mg/dl      |                                                         |                                                                         |      |                                                                         |      |                                                                                |      |
| ≤ 83.8                             | 77                                                      | 0.09 (-0.10, 0.29)                                                      | 0.94 | -0.22 (-0.43, -0.01)                                                    | 0.14 | -0.31 (-0.54, -0.08)                                                           | 0.16 |
| > 83.8                             | 79                                                      | 0.08 (-0.16, 0.32)                                                      |      | 0.02 (-0.21, 0.25)                                                      |      | -0.06 (-0.32, 0.20)                                                            |      |
| Body mass index, kg/m <sup>2</sup> |                                                         |                                                                         |      |                                                                         |      |                                                                                |      |
| 25-29.9                            | 68                                                      | 0.10 (-0.10, 0.31)                                                      | 0.84 | -0.09 (-0.33, 0.14)                                                     | 1.00 | -0.20 (-0.41, 0.01)                                                            | 0.85 |
| 30+                                | 88                                                      | 0.07 (-0.15, 0.30)                                                      |      | -0.09 (-0.31, 0.12)                                                     |      | -0.17 (-0.43, 0.09)                                                            |      |
| HOMA, units                        |                                                         |                                                                         |      |                                                                         |      |                                                                                |      |
| ≤1.48                              | 77                                                      | 0.07 (-0.13, 0.27)                                                      | 0.91 | -0.08 (-0.32, 0.16)                                                     | 0.81 | -0.15 (-0.42, 0.11)                                                            | 0.76 |
| >1.48                              | 79                                                      | 0.09 (-0.14, 0.33)                                                      |      | -0.11 (-0.32, 0.09)                                                     |      | -0.21 (-0.44, 0.02)                                                            |      |
| Fasting glucose, mg/dL             |                                                         |                                                                         |      |                                                                         |      |                                                                                |      |
| <100                               | 100                                                     | 0.12 (-0.08, 0.33)                                                      | 0.51 | -0.08 (-0.29, 0.12)                                                     | 0.78 | -0.20 (-0.43, 0.03)                                                            | 0.75 |
| ≥100                               | 56                                                      | 0.02 (-0.21, 0.25)                                                      |      | -0.13 (-0.37, 0.12)                                                     |      | -0.15 (-0.41, 0.12)                                                            |      |

|                                    |     |                     |      |                            |      |                            |      |
|------------------------------------|-----|---------------------|------|----------------------------|------|----------------------------|------|
| Glycated albumin, %                |     |                     |      |                            |      |                            |      |
| ≤14.8                              | 65  | 0.01 (-0.20, 0.21)  | 0.56 | 0.00 (-0.24, 0.25)         | 0.03 | 0.00 (-0.22, 0.22)         | 0.09 |
| >14.8                              | 65  | 0.09 (-0.12, 0.30)  |      | <b>-0.28 (-0.50,-0.06)</b> |      | <b>-0.37 (-0.61,-0.13)</b> |      |
| Fructosamine, μmol/L               |     |                     |      |                            |      |                            |      |
| ≤234.5                             | 65  | 0.11 (-0.07, 0.30)  | 0.50 | -0.03 (-0.30, 0.23)        | 0.26 | -0.14 (-0.40, 0.11)        | 0.60 |
| >234.5                             | 65  | 0.01 (-0.23, 0.24)  |      | <b>-0.23 (-0.43,-0.02)</b> |      | <b>-0.23 (-0.45,-0.01)</b> |      |
| Plasma Fructosamine, μmol/L*       |     |                     |      |                            |      |                            |      |
| Non-Hispanic                       |     |                     |      |                            |      |                            |      |
| White                              | 65  | 1.65 (-2.38, 5.68)  | 0.25 | -3.57 (-7.55, 0.42)        | 0.58 | -5.22 (-9.64,-0.80)        | 0.58 |
| Black                              | 79  | -1.36 (-4.70, 1.97) |      | -5.03 (-8.46,-1.61)        |      | -3.67 (-7.02,-0.33)        |      |
| Hypertension status                |     |                     |      |                            |      |                            |      |
| No                                 | 116 | 0.17 (-3.04, 3.39)  | 0.43 | -4.32 (-7.33,-1.30)        | 0.54 | -4.49 (-7.62,-1.36)        | 0.24 |
| Yes                                | 40  | -1.79 (-5.59, 2.00) |      | -2.57 (-7.22, 2.07)        |      | -0.78 (-6.10, 4.55)        |      |
| Baseline Triglycerides, mg/dl      |     |                     |      |                            |      |                            |      |
| ≤ 83.8                             | 77  | 1.37 (-1.95, 4.69)  | 0.18 | -2.96 (-6.56, 0.64)        | 0.47 | -4.33 (-7.99,-0.67)        | 0.56 |
| > 83.8                             | 79  | -2.14 (-6.02, 1.74) |      | -4.85 (-8.38,-1.32)        |      | -2.71 (-6.66, 1.24)        |      |
| Body mass index, kg/m <sup>2</sup> |     |                     |      |                            |      |                            |      |
| 25-29.9                            | 68  | -1.75 (-5.52, 2.02) | 0.35 | -5.96 (-9.66,-2.26)        | 0.17 | -4.21 (-8.44, 0.02)        | 0.69 |
| 30+                                | 88  | 0.74 (-2.79, 4.26)  |      | -2.37 (-5.84, 1.10)        |      | -3.11 (-6.63, 0.41)        |      |
| HOMA, units                        |     |                     |      |                            |      |                            |      |
| ≤1.48                              | 77  | 0.94 (-2.68, 4.57)  | 0.35 | -4.07 (-7.42,-0.73)        | 0.87 | -5.02 (-8.48,-1.55)        | 0.30 |
| >1.48                              | 79  | -1.52 (-5.10, 2.07) |      | -3.66 (-7.46, 0.15)        |      | -2.14 (-6.24, 1.96)        |      |
| Fasting glucose, mg/dL             |     |                     |      |                            |      |                            |      |
| <100                               | 100 | 0.67 (-2.26, 3.60)  | 0.35 | <b>-4.66 (-7.85,-1.48)</b> | 0.37 | <b>-5.33 (-8.30,-2.37)</b> | 0.10 |
| ≥100                               | 56  | -2.04 (-6.86, 2.78) |      | -2.30 (-6.37, 1.78)        |      | -0.26 (-5.53, 5.00)        |      |

|                      |    |                     |      |                            |      |                     |
|----------------------|----|---------------------|------|----------------------------|------|---------------------|
| Glycated albumin, %  |    |                     |      |                            |      |                     |
| ≤14.8                | 65 | -2.81 (-6.07, 0.46) | 0.14 | <b>-5.38 (-9.16,-1.59)</b> | 0.24 | -2.57 (-6.43, 1.29) |
| >14.8                | 65 | 1.45 (-3.07, 5.96)  |      | -2.06 (-6.25, 2.13)        |      | -3.51 (-8.12, 1.10) |
|                      |    |                     |      |                            |      | 0.77                |
| Fructosamine, μmol/L |    |                     |      |                            |      |                     |
| ≤234.5               | 65 | -2.30 (-5.83, 1.23) | 0.31 | <b>-4.11 (-8.15,-0.07)</b> | 0.82 | -1.81 (-5.75, 2.14) |
| >234.5               | 65 | 0.64 (-3.81, 5.08)  |      | -3.47 (-7.52, 0.57)        |      | -4.11 (-8.71, 0.49) |
|                      |    |                     |      |                            |      | 0.46                |

---

Note: HOMA represents homeostasis model assessment.

\*This population was restricted to non-hemolyzed specimens due to the effects of hemolysis on the glycated albumin and fructosamine assays.

While only 130 persons contributed baseline data, 156 contributed at least 2 dietary comparisons.



**Supplement Table S2. Pearson correlation coefficient and linear associations between glycated albumin, fructosamine, and diabetes risk factors assessed at baseline (N =130)**

|                                         | Plasma Glycated Albumin, % |         |            | Plasma Fructosamine, $\mu\text{mol/L}$ |         |            |
|-----------------------------------------|----------------------------|---------|------------|----------------------------------------|---------|------------|
|                                         | <i>r</i>                   | $\beta$ | <i>p</i> * | <i>r</i>                               | $\beta$ | <i>p</i> * |
| Plasma glycated albumin, %              | 1.00                       | -       | -          | 0.58                                   | 8.26    | <0.001     |
| Plasma fructosamine, $\mu\text{mol/L}$  | 0.58                       | 0.014   | 0.001      | 1.00                                   | -       | -          |
| Body mass index, $\text{kg/m}^2$        | -0.29                      | -0.090  | <0.001     | -0.23                                  | -0.96   | 0.005      |
| Waist circumference, cm                 | -0.32                      | -0.034  | <0.001     | -0.21                                  | -0.35   | 0.02       |
| HDL cholesterol, mg/dL                  | 0.06                       | -0.013  | 0.15       | -0.06                                  | -0.16   | 0.26       |
| LDL cholesterol, mg/dL                  | 0.10                       | 0.002   | 0.62       | 0.11                                   | 0.05    | 0.32       |
| Triglycerides, mg/dL                    | -0.14                      | 0.0003  | 0.90       | -0.15                                  | -0.04   | 0.22       |
| Serum fasting glucose, mg/dL            | -0.01                      | -0.004  | 0.65       | 0.16                                   | 0.22    | 0.11       |
| Serum fasting insulin, $\mu\text{U/mL}$ | -0.18                      | -0.038  | 0.08       | -0.06                                  | -0.16   | 0.63       |
| HOMA, units                             | -0.16                      | -0.115  | 0.13       | -0.02                                  | -0.07   | 0.95       |

\*P-value for ordinary least squares coefficient ( $\beta$ ) adjusted for age, sex, and race/ethnicity

Note: HDL represents high density lipoprotein cholesterol; LDL represents low density lipoprotein cholesterol; HOMA represents homeostasis model assessment of insulin resistance

**Supplement Table S3. Number and mean (SD) of glycemic markers and high sensitivity C-reactive protein at the end of baseline and each dietary intervention**

|                                           | Baseline |              | High Carbohydrate/High Glycemic Index |                           | High Carbohydrate/Low Glycemic Index |                         | Low Carbohydrate/High Glycemic Index |                           | Low Carbohydrate/Low Glycemic Index |                           |
|-------------------------------------------|----------|--------------|---------------------------------------|---------------------------|--------------------------------------|-------------------------|--------------------------------------|---------------------------|-------------------------------------|---------------------------|
|                                           | No.      | Mean (SD)    | No.                                   | Mean (SD)                 | No.                                  | Mean (SD)               | No.                                  | Mean (SD)                 | No.                                 | Mean (SD)                 |
| Serum glucose, mg/dL                      | 159      | 97.3 (13.7)  | 146                                   | 94.3 (13.5) <sup>a</sup>  | 149                                  | 96.0 (14.7)             | 147                                  | 95.1 (11.9)               | 149                                 | 97.5 (13.8)               |
| Serum insulin, $\mu$ U/mL                 | 159      | 7.7 (5.8)    | 146                                   | 6.8 (5.0)                 | 149                                  | 7.8 (6.9)               | 147                                  | 7.1 (5.6)                 | 149                                 | 7.5 (7.1)                 |
| Plasma glycated albumin*, %-point         | 131      | 14.9 (1.6)   | 120                                   | 14.9 (1.6)                | 129                                  | 14.8 (1.6) <sup>a</sup> | 128                                  | 14.6 (1.5) <sup>c</sup>   | 129                                 | 14.6 (1.4) <sup>c</sup>   |
| Plasma fructosamine*, $\mu$ mol/L         | 131      | 235.6 (22.1) | 120                                   | 232.9 (24.7) <sup>a</sup> | 129                                  | 235.5 (21.6)            | 128                                  | 232.1 (19.7) <sup>b</sup> | 129                                 | 230.9 (20.9) <sup>c</sup> |
| High sensitivity C-reactive protein, mg/L | 159      | 3.2 (4.0)    | 146                                   | 3.2 (3.8)                 | 149                                  | 3.0 (3.6)               | 146                                  | 3.3 (4.2)                 | 149                                 | 3.8 (7.5)                 |

\*Excluding hemolyzed specimens.

a  $P \leq 0.05$  when compared to baseline

b  $P \leq 0.01$  when compared to baseline

c  $P \leq 0.001$  when compared to baseline
